# Supplementary material for: Determination of Tympanostomy Tube Types for Otitis Media with Effusion in Patients with Cleft Palate: Comparison between Paparella Type 1 and Type 2 Tubes
Source: MDPI journal article supplement (doi:10.3390/jcm12206651), 2023-10-20
Supplement: s1 [file s1]

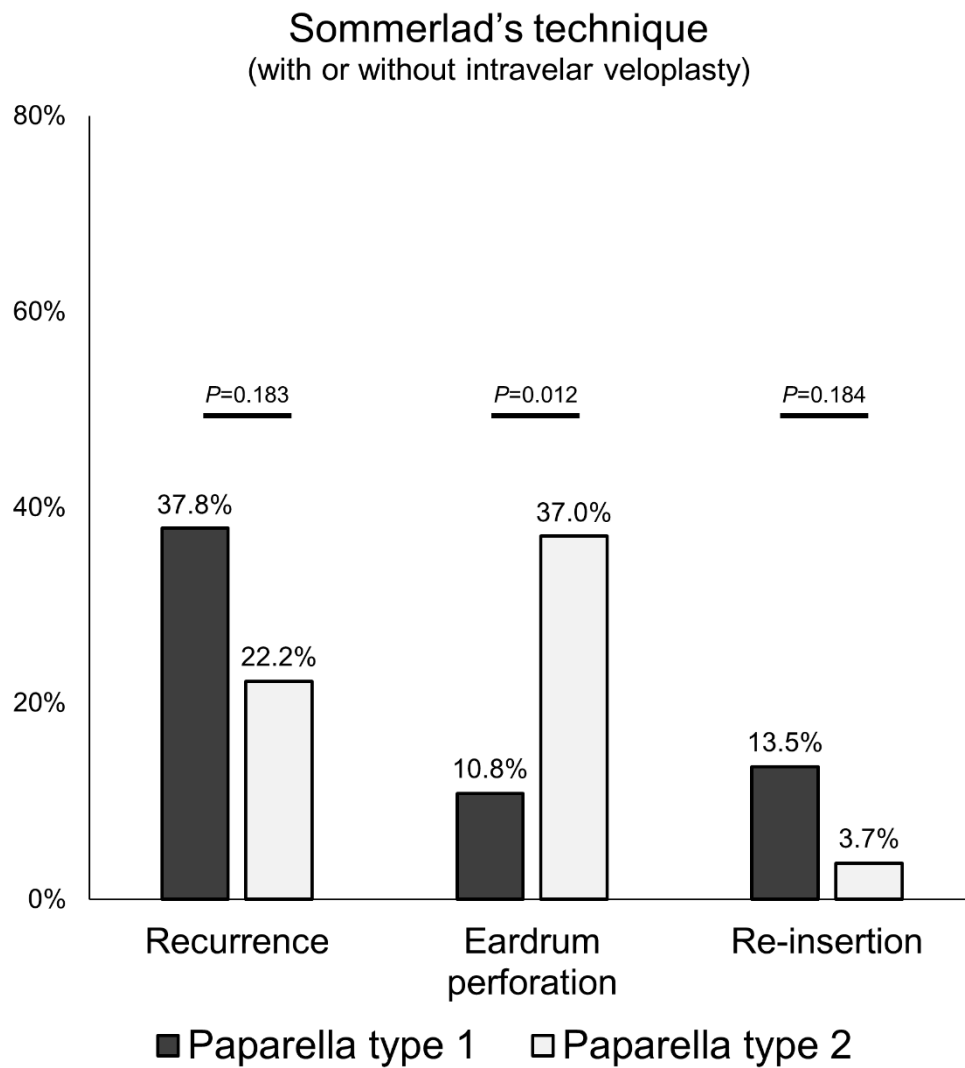

**Supplemental Figure S1.** Recurrence and eardrum perforation rates according to type of tympanostomy tube insertion in patients undergoing palatoplasty using Sommerlad's technique with or without intravelar veloplasty.
